# Supplementary material for: Nutrient and salt depletion synergistically boosts glucose metabolism in individual Escherichia coli cells
Source: PubMed Central journal article supplement (PMC9021252; doi:10.1038/s42003-022-03336-6), 2022-04-20
Supplement: 42003_2022_3336_MOESM1_ESM.pdf [file 42003_2022_3336_MOESM1_ESM.pdf]

1 SUPPLEMENTARY INFORMATION

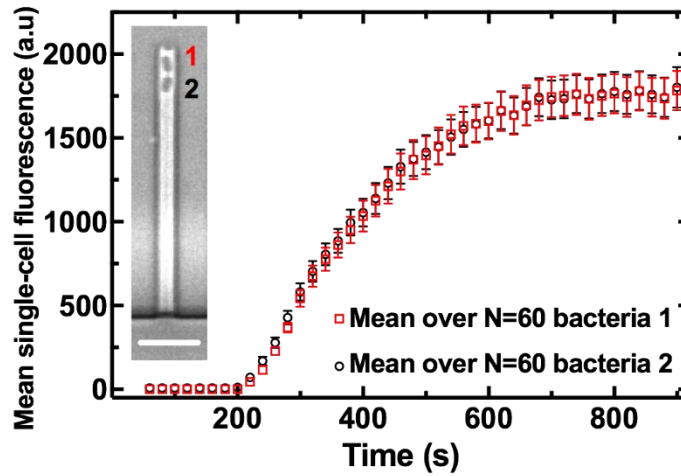

2  
3 **Supplementary Figure 1.** Temporal dependence of the mean intracellular fluorescence of the  
4 glucose analogue 2-NBDG averaged over 60 individual *E. coli* at the top of each dead-end  
5 bacteria-hosting channel (red squares, position 1) or below such cells (black circles, position  
6 2). Bacteria at position 2 are closer to the main microfluidic chamber i.e. the 2-NBDG source,  
7 whereas bacteria at position 1 are screened by one cell. Statistical comparisons are reported in  
8 Table S1. Inset: bright-field microscopy image illustrating bacteria in positions 1 and 2, scale  
9 bar: 5  $\mu\text{m}$ .

10  
11

| Time (s) | t ratio | df | p-value |
|----------|---------|----|---------|
| 0        |         |    |         |
| 100      | 1,26    | 58 | 0,21    |
| 200      | 1,60    | 58 | 0,11    |
| 300      | 0,52    | 58 | 0,60    |
| 400      | 0,18    | 58 | 0,86    |
| 500      | 0,12    | 58 | 0,91    |
| 600      | 0,01    | 58 | 0,99    |
| 700      | 0,11    | 58 | 0,92    |
| 800      | 0,07    | 58 | 0,94    |
| 900      | 0,11    | 58 | 0,91    |

12  
13 **Supplementary Table 1.** Statistical comparisons of 2-NBDG accumulation in *E. coli* at the  
14 top of each dead-end bacteria-hosting channel or below such cells (positions 1 and 2 in Fig.  
15 S1, respectively).  
16

| Time (s) | Optimal growth conditions |                     | Nutrient depletion          |                     |
|----------|---------------------------|---------------------|-----------------------------|---------------------|
|          | Mean fluorescence (a.u.)  | CV fluorescence (%) | Mean fluorescence (a.u.)    | CV fluorescence (%) |
| 0        | 0                         | 0                   | 0                           | 0                   |
| 100      | 17                        | 48                  | 22                          | 61                  |
| 200      | 37                        | 90                  | 40                          | 49                  |
| 300      | 250                       | 46                  | 417                         | 58                  |
| 400      | 435                       | 35                  | 546                         | 58                  |
| 500      | 533                       | 33                  | 647                         | 55                  |
| 600      | 613                       | 32                  | 692                         | 57                  |
| 700      | 685                       | 32                  | 762                         | 55                  |
| 800      | 699                       | 33                  | 769                         | 58                  |
| 900      | 733                       | 32                  | 740                         | 60                  |
| 1000     | 730                       | 34                  | 683                         | 54                  |
| 1100     | 761                       | 32                  | 663                         | 59                  |
| 1200     | 580                       | 46                  | 458                         | 54                  |
| 1300     | 350                       | 47                  | 293                         | 61                  |
| 1400     | 231                       | 49                  | 208                         | 64                  |
| 1500     | 156                       | 52                  | 150                         | 67                  |
| 1600     | 112                       | 52                  | 113                         | 69                  |
| 1700     | 83                        | 55                  | 91                          | 67                  |
| 1800     | 63                        | 55                  | 76                          | 69                  |
| 1900     | 53                        | 53                  | 64                          | 64                  |
| 2000     | 42                        | 47                  | 51                          | 64                  |
|          |                           |                     |                             |                     |
| Time (s) | Salt depletion            |                     | Nutrient and salt depletion |                     |
|          | Mean fluorescence (a.u.)  | CV fluorescence (%) | Mean fluorescence (a.u.)    | CV fluorescence (%) |
| 0        | 0                         | 0                   | 0                           | 0                   |
| 100      | 12                        | 86                  | 12                          | 86                  |
| 200      | 13                        | 84                  | 16                          | 90                  |
| 300      | 148                       | 70                  | 722                         | 43                  |
| 400      | 262                       | 45                  | 1208                        | 42                  |
| 500      | 298                       | 43                  | 1507                        | 40                  |
| 600      | 332                       | 39                  | 1669                        | 38                  |
| 700      | 326                       | 41                  | 1648                        | 39                  |
| 800      | 317                       | 43                  | 1676                        | 38                  |
| 900      | 373                       | 39                  | 1714                        | 38                  |
| 1000     | 393                       | 43                  | 1583                        | 39                  |
| 1100     | 429                       | 38                  | 1670                        | 38                  |
| 1200     | 328                       | 45                  | 1146                        | 46                  |
| 1300     | 155                       | 38                  | 582                         | 55                  |
| 1400     | 83                        | 50                  | 341                         | 64                  |
| 1500     | 44                        | 98                  | 186                         | 55                  |
| 1600     | 34                        | 118                 | 124                         | 60                  |
| 1700     | 23                        | 128                 | 82                          | 79                  |
| 1800     | 25                        | 143                 | 53                          | 70                  |
| 1900     | 29                        | 151                 | 40                          | 62                  |
| 2000     | 18                        | 169                 | 27                          | 71                  |

17  
18 **Supplementary Table 2.** Temporal dependence of the mean and coefficient of variation of  
19 intracellular fluorescence of the glucose analogue 2-NBDG over at least 30 individual *E. coli*  
20 (collated from biological triplicate) per environmental condition as detailed in Figure 2.

21  
22  
23  
24  
25

| Time (s) | Nutrient depletion          |        |                   |
|----------|-----------------------------|--------|-------------------|
|          | t ratio                     | df     | p-value           |
| 0        |                             |        |                   |
| 100      | 2,07                        | 112,00 | 0,04              |
| 200      | 0,45                        | 112,00 | 0,65              |
| 300      | 4,96                        | 112,00 | <10 <sup>-5</sup> |
| 400      | 2,53                        | 112,00 | 0,01              |
| 500      | 2,27                        | 112,00 | 0,03              |
| 600      | 1,43                        | 112,00 | 0,15              |
| 700      | 0,30                        | 112,00 | 0,20              |
| 800      | 1,11                        | 112,00 | 0,27              |
| 900      | 0,12                        | 112,00 | 0,90              |
|          |                             |        |                   |
| Time (s) | Salt depletion              |        |                   |
|          | t ratio                     | df     | p-value           |
| 0        |                             |        |                   |
| 100      | 3,46                        | 166,00 | <10 <sup>-3</sup> |
| 200      | 6,43                        | 166,00 | <10 <sup>-6</sup> |
| 300      | 5,89                        | 166,00 | <10 <sup>-6</sup> |
| 400      | 7,94                        | 166,00 | <10 <sup>-6</sup> |
| 500      | 9,47                        | 166,00 | <10 <sup>-6</sup> |
| 600      | 10,74                       | 166,00 | <10 <sup>-6</sup> |
| 700      | 12,05                       | 146,00 | <10 <sup>-6</sup> |
| 800      | 12,35                       | 146,00 | <10 <sup>-6</sup> |
| 900      | 11,11                       | 146,00 | <10 <sup>-6</sup> |
|          |                             |        |                   |
| Time (s) | Nutrient and salt depletion |        |                   |
|          | t ratio                     | df     | p-value           |
| 0        |                             |        |                   |
| 100      | 3,39                        | 120,00 | <10 <sup>-3</sup> |
| 200      | 3,99                        | 120,00 | <10 <sup>-4</sup> |
| 300      | 11,91                       | 120,00 | <10 <sup>-6</sup> |
| 400      | 12,33                       | 120,00 | <10 <sup>-6</sup> |
| 500      | 13,14                       | 120,00 | <10 <sup>-6</sup> |
| 600      | 13,55                       | 120,00 | <10 <sup>-6</sup> |
| 700      | 11,89                       | 110,00 | <10 <sup>-6</sup> |
| 800      | 11,96                       | 110,00 | <10 <sup>-6</sup> |
| 900      | 11,60                       | 110,00 | <10 <sup>-6</sup> |

26  
27  
28  
29  
30  
31  
32  
33  
34  
35  
36  
37  
38

**Supplementary Table 3.** Statistical comparisons of 2-NBDG accumulation in *E. coli* under nutrient, salt or combined nutrient and salt depletion compared to optimal growth conditions.

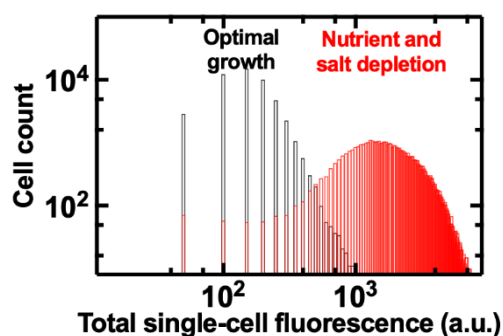

39  
40 **Supplementary Figure 2.** Total intracellular fluorescence of the glucose analogue 2-NBDG  
41 in individual *E. coli* under optimal growth conditions and combined nutrient and salt depletion  
42 (black and red bars, respectively) measured by flow cytometry after 900s bulk incubation in 2-  
43 NBDG. Noteworthy, these measurements were not normalized by cell size.  
44

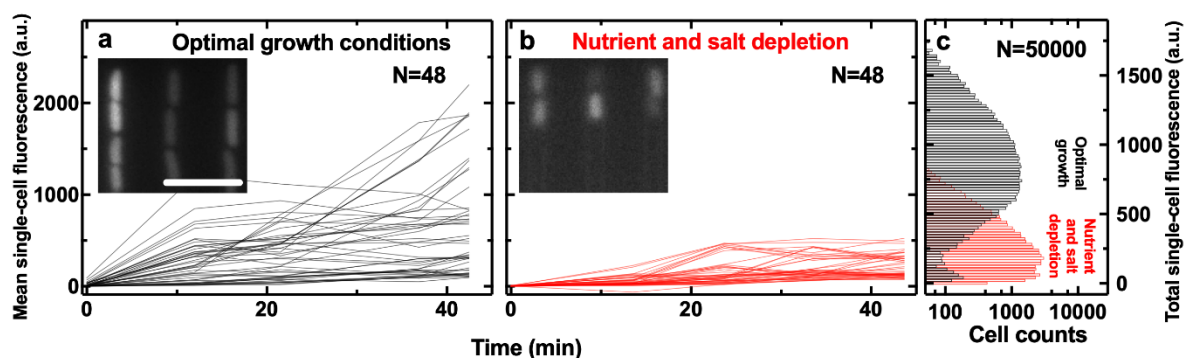

45  
46 **Supplementary Figure 3.** Temporal dependence of the mean intracellular fluorescence of  
47 thioflavin T in individual *E. coli* in **a)** optimal growth conditions and **b)** under combined  
48 nutrient and salt depletion. Lines are temporal dependences of the intracellular fluorescence of  
49 individual bacteria collated from biological triplicate. Noteworthy, we measured thioflavin T  
50 fluorescence as the mean fluorescent values of each pixel constituting each bacterium, thus  
51 normalizing by cell size. Insets: corresponding fluorescence images at  $t=45\text{min}$  when the  
52 intracellular ThT accumulation has reached saturation levels in individual bacteria. **c)**  
53 Corresponding total intracellular fluorescence of thioflavin T under optimal growth conditions  
54 or combined nutrient and salt depletion (black and red bars, respectively) measured by flow  
55 cytometry after 45min bulk incubation in thioflavin T. Noteworthy, these measurements were  
56 not normalized by cell size. Statistical comparisons are reported in Table S4.  
57  
58

| Time (min) | Microfluidics-microscopy assay |    |            | Flow cytometry assay |       |            |
|------------|--------------------------------|----|------------|----------------------|-------|------------|
|            | t ratio                        | df | p-value    | t ratio              | df    | p-value    |
| 0          | 3,78                           | 94 | $<10^{-6}$ |                      |       |            |
| 12         | 7,98                           | 94 | $<10^{-6}$ |                      |       |            |
| 22         | 5,56                           | 94 | $<10^{-6}$ |                      |       |            |
| 37         | 6,01                           | 94 | $<10^{-6}$ |                      |       |            |
| 42         | 6,23                           | 94 | $<10^{-6}$ | 257,9                | 99578 | $<10^{-6}$ |

59  
60 **Supplementary Table 4.** Statistical comparisons of thioflavin T accumulation in *E. coli* in  
61 optimal growth conditions and under combined nutrient and salt depletion as measured via  
62 single-cell microfluidics-microscopy and flow cytometry.

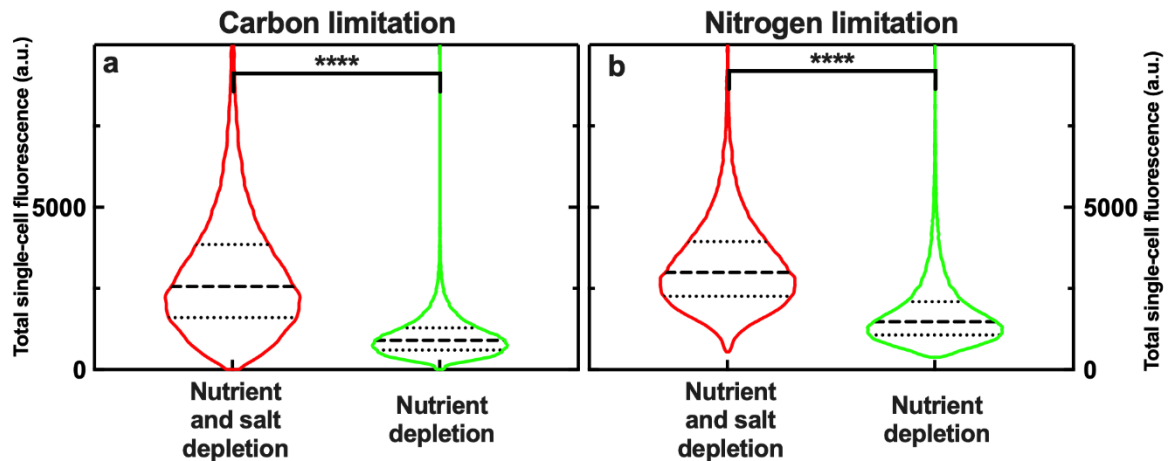

63  
 64 **Supplementary Figure 4.** Distribution of total intracellular fluorescence of 2-NBDG under  
 65 nutrient depletion alone or combined nutrient and salt depletion (green and red violins,  
 66 respectively) using M9 minimal medium with limited (i.e. 0.1 g/L) **a)** glucose or **b)** ammonia.  
 67 Measurements were performed on 50,000 bacteria for each environmental condition using flow  
 68 cytometry after 900s bulk incubation in 2-NBDG. These measurements were not normalized  
 69 by cell size. \*\*\*\*: p-value <0.0001.

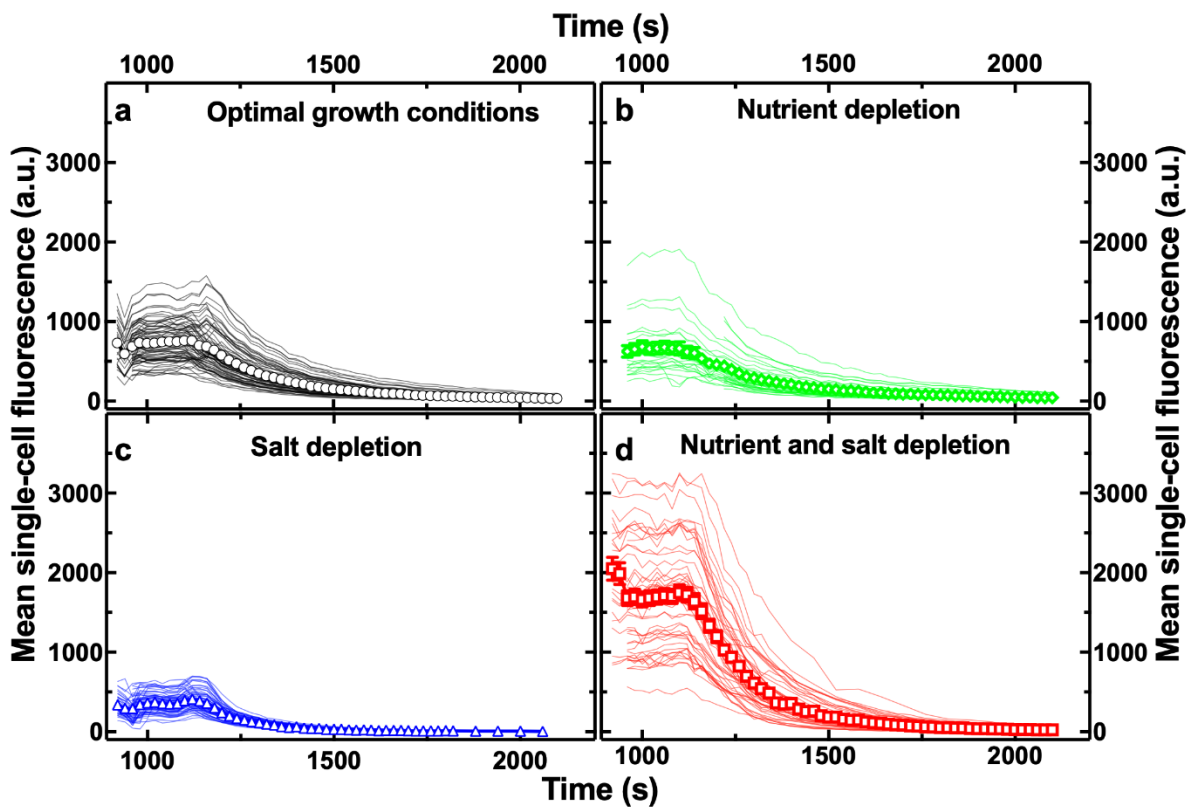

70  
 71 **Supplementary Figure 5.** Temporal dependence of the mean intracellular fluorescence of the  
 72 glucose analogue 2-NBDG in individual *E. coli* under **a)** optimal growth conditions, **b)** nutrient  
 73 depletion, **c)** salt depletion or **d)** combined nutrient and salt depletion during removal of 2-  
 74 NBDG from the extracellular environment. Lines are temporal dependences of the intracellular  
 75 fluorescence of individual bacteria from biological triplicate. Symbols and error bars are the  
 76 corresponding means and standard error of the means of such single-cell measurements. Means  
 77 and coefficient of variations of these single-cell values are reported in Table S2. These  
 78 measurements were normalized by cell size. Measurements were carried out on N=76, 38, 90  
 79 and 46 individual bacteria, in a)-d), respectively.

80

| Comparisons with optimal growth | Uptake rate |       |         | Degradation rate |    |         |
|---------------------------------|-------------|-------|---------|------------------|----|---------|
|                                 | t ratio     | df    | p-value | t ratio          | df | p-value |
| Nutrient depletion              | 3.88        | 62,0  | 0.0003  | 3.41             | 42 | 0.0015  |
| Salt depletion                  | 7.46        | 116,0 | <0.0001 | 10.97            | 83 | <0.0001 |
| Nutrient and salt depletion     | 2.59        | 86,0  | 0.01    | 9.30             | 80 | <0.0001 |

81  
82  
83  
84  
85

**Supplementary Table 5.** Statistical comparisons of the predicted 2-NBDG uptake and degradation values under nutritional, salinity or combined nutritional and salinity depletion compared to optimal growth conditions.

| Environment                 | Uptake rate |        | Degradation rate |        |
|-----------------------------|-------------|--------|------------------|--------|
|                             | Median      | CV (%) | Median           | CV (%) |
| Optimal growth conditions   | -1,73       | 13     | -2,35            | 3      |
| Nutrient depletion          | -1,94       | 15     | -2,31            | 9      |
| Salt depletion              | -2,05       | 15     | -2,12            | 9      |
| Nutrient and salt depletion | -1,52       | 19     | -2,18            | 5      |

86  
87  
88  
89  
90

**Supplementary Table 6.** Median and coefficient of variation (CV) of the predicted uptake and degradation rate values in optimal growth conditions, under nutritional, salinity or combined nutritional and salinity depletion.

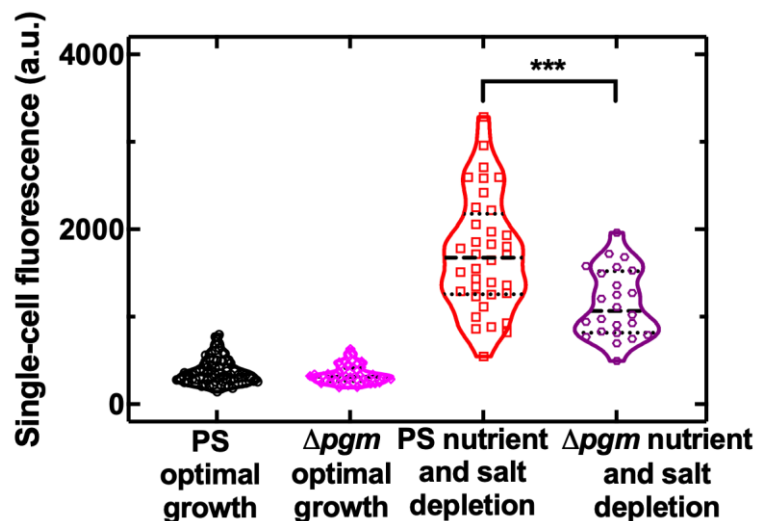91  
92  
93  
94  
95  
96  
97  
98  
99  
100  
101  
102  
103

**Supplementary Figure 6.** Distribution of single-cell fluorescence after 900 s incubation in 2-NBDG for the parental strain (PS) and  $\Delta pgm$  deletion mutant under salt depletion or simultaneous nutrient and salt depletion. Dashed and dotted lines indicate the median and quartiles of each distribution, respectively. Under nutrient and salt depletion the  $\Delta pgm$  deletion mutant displayed significantly lower 2-NBDG accumulation compared to the parental strain (\*\*\*). In contrast, under optimal growth conditions the  $\Delta pgm$  deletion mutant displayed 2-NBDG accumulation comparable to the parental strain.

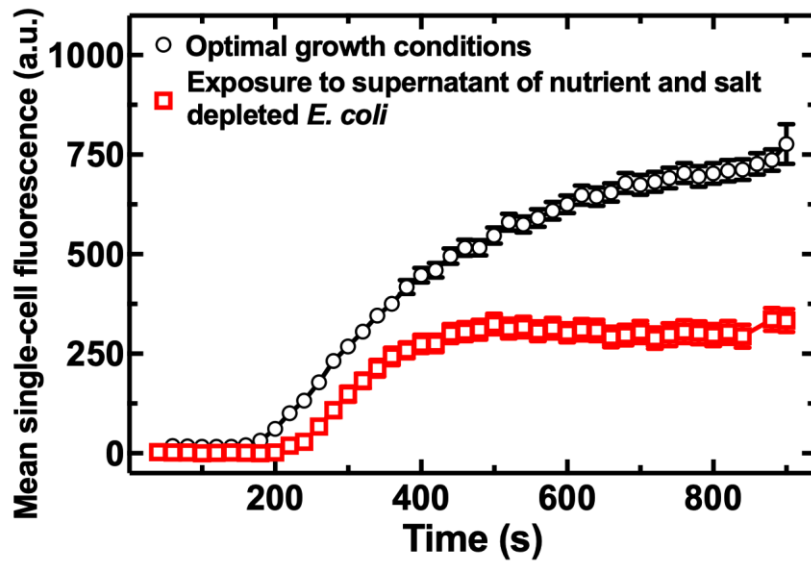

104  
 105 **Supplementary Figure 7.** Temporal dependence of the mean intracellular fluorescence of the  
 106 glucose analogue 2-NBDG in *E. coli* cultured in optimal growth conditions without (circles)  
 107 or with an additional 1h exposure to the supernatant collected from *E. coli* cultures under  
 108 combined nutritional and salinity depletion (squares) before 2-NBDG accumulation  
 109 measurements. Symbols and error bars are the means and standard error of the means over at  
 110 least 20 single-cell measurements.

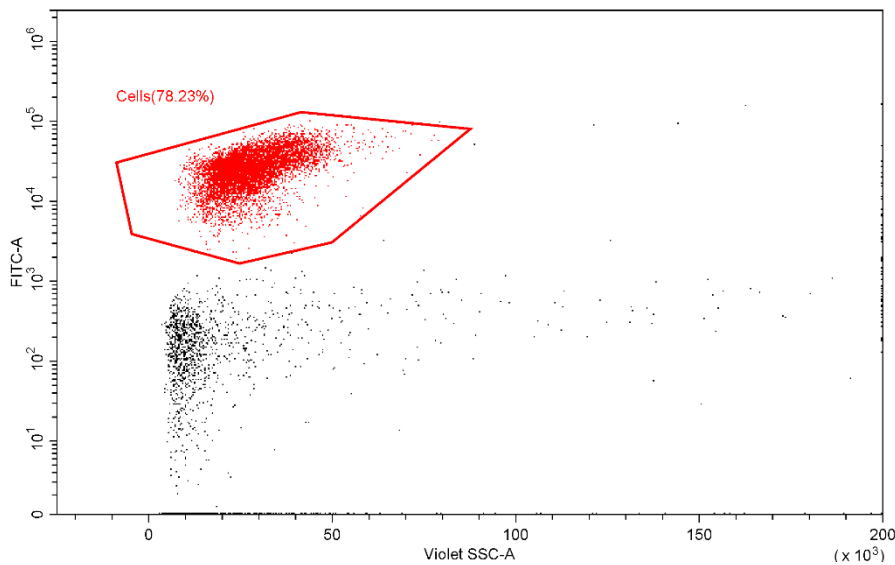

111  
 112  
 113  
 114  
 115  
 116  
 117  
 118  
 119  
 120  
 121  
 122  
 123  
 124  
 125  
 126  
 127  
 128  
 129 **Supplementary Figure 8.** Gating strategy for all flow cytometry experiments. Cells (red) were  
 130 separated from background debris (black) by gating bacterial cells (red) using a plot of  
 131 fluorescein isothiocyanate channel (FITC-A) against violet side scatter (Violet-SSC-A).  
 132
