# Supplementary material for: Nutrient and salt depletion synergistically boosts glucose metabolism in individual Escherichia coli cells
Source: PubMed Central journal article supplement (PMC9021252; doi:10.1038/s42003-022-03336-6), 2022-04-20
Supplement: 42003_2022_3336_MOESM2_ESM.pdf [file 42003_2022_3336_MOESM2_ESM.pdf]

## Description of Additional Supplementary Files

**File name:** Supplementary Data 1

**Description:** RNA transcript  $\log_2$  fold change and adjusted p-values file 1

**File name:** Supplementary Data 2

**Description:** RNA transcript  $\log_2$  fold change and adjusted p-values file 2

**File name:** Supplementary Data 3

**Description:** Protein  $\log_2$  fold change and adjusted p-values

**File name:** Supplementary Data 4

**Description:** Phosphoproteomic modifications and abundance

**File name:** Supplementary Data 5

**Description:** Exact p-values for main manuscript figures

**File name:** Supplementary Data 6

**Description:** All raw data for main manuscript figures
